# Supplementary material for: Effectiveness of the blended care self-management program “Partner in Balance” for early-stage dementia caregivers: study protocol for a randomized controlled trial
Source: Springer Nature journal article supplement (doi:10.1186/s13063-016-1351-z), 2016-05-04
Supplement: MOESM2 [file 10111848]

## Additional file 2. Registration form coaches Partner in Balance

Participant number: \_\_\_\_\_

|                                                                                                                                                                                                                                                                                                                           | Date | Time spent | (If applicable)<br>On whose<br>initiative? | Topics<br>discussed | Other remarks |
|---------------------------------------------------------------------------------------------------------------------------------------------------------------------------------------------------------------------------------------------------------------------------------------------------------------------------|------|------------|--------------------------------------------|---------------------|---------------|
| <b>Action undertaken</b>                                                                                                                                                                                                                                                                                                  |      |            |                                            |                     |               |
| Preparation <ul style="list-style-type: none"> <li>- Attending coach training</li> <li>- Reading protocol</li> <li>- Attending coach intervention meetings</li> </ul>                                                                                                                                                     |      |            |                                            |                     |               |
| Intake session <ul style="list-style-type: none"> <li>- Getting acquainted</li> <li>- Needs assessment</li> <li>- Setting GAS goals</li> <li>- Choosing modules + adding modules to account</li> <li>- Explaining online procedure</li> <li>- Contact moment agreements</li> <li>- Providing login information</li> </ul> |      |            |                                            |                     |               |
| Online period <ul style="list-style-type: none"> <li>- Responding to online assignments (email)</li> <li>- Other online help (support requests, reminders)</li> <li>- Telephone contacts (if applicable)</li> </ul>                                                                                                       |      |            |                                            |                     |               |
| Evaluation session <ul style="list-style-type: none"> <li>- General evaluation of modules and experience with the program</li> <li>- Evaluating GAS goals</li> <li>- Identify need for additional modules or types of aid</li> </ul>                                                                                      |      |            |                                            |                     |               |
